# Supplementary material for: Salmonella paratyphi C: Genetic Divergence from Salmonella choleraesuis and Pathogenic Convergence with Salmonella typhi
Source: PLoS One. 2009 Feb 20;4(2):e4510. doi: 10.1371/journal.pone.0004510 (PMC2640428; doi:10.1371/journal.pone.0004510)
Supplement: Table S4 — (0.02 MB XLS) [file pone.0004510.s003.xls]

## Sheet: Sheet1
Supplementary Table 4. Convergent Amino Acids Changes in S. paratyphi C RKS4594 with other human-adapted Salmonella typhoid agents
gene	amino acid site in the protein sequence	SC	SPA	SPC	STM	CT18	Ty2	symbol	product
SPC_2589	105	A	T	T	A	A	A	solA	putative sarcosine oxidase
SPC_2506	397	E	E	D	E	D	D	icdA	isocitrate dehydrogenase
SPC_2164	218	S	H	N	H	N	N	smvA	methyl viologen resistance
SPC_1605	534	P	P	S	P	S	S	wzc	putative tyrosine protein kinase
SPC_2767	32	V	V	G	V	G	G	-	putative cytoplasmic protein
SPC_2889	59	S	L	L	D	D	D	hycF	hydrogenase 4 Fe-S subunit
SPC_3567	226	N	D	D	N	E	E	hslO	Hsp33-like chaperonin
SPC_2274	674	A	P	P	A	P	P	-	electron transport complex protein RnfC
SPC_4237	178	M	I	I	M	I	I	trmA	tRNA (uracil-5-)-methyltransferase
